# Supplementary material for: Rapid detection of microalgae cells based on upconversion nanoprobes
Source: Royal Society of Chemistry journal article supplement (doi:10.1039/d4ay00387j), 2024-01-01
Supplement: d4ay00387j1.pdf [file d4ay00387j1.pdf]

## Supporting Information

### Rapid Detection of Microalgae Cells Based on Upconversion Nanoprobes

Jiayao Li, Xiaohong Xue\*, Fangyun Xin, Mingming Xing, Qiang Pang, Hong Wang\*  
and Ying Tian\*

School of Science, Dalian Maritime University, Dalian 116026, China

Email: [tianying@dlmu.edu.cn](mailto:tianying@dlmu.edu.cn), [wanghong@dlmu.edu.cn](mailto:wanghong@dlmu.edu.cn), [xuexiaohong@dlmu.edu.cn](mailto:xuexiaohong@dlmu.edu.cn)

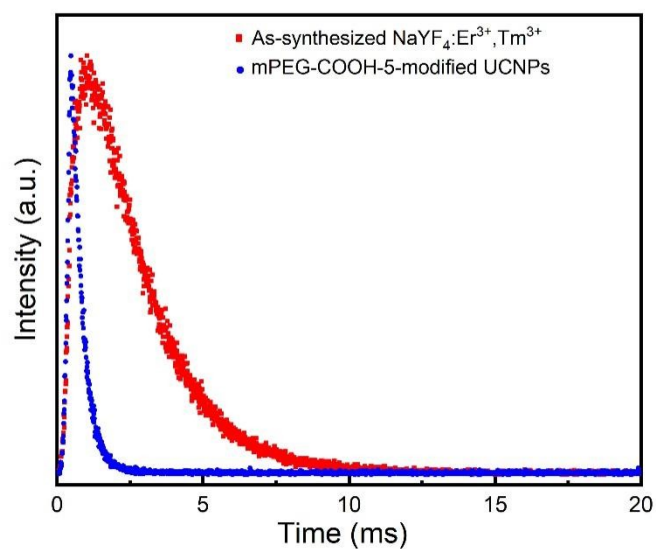

**Figure S1.** Fluorescence decay dynamics of  $^4F_{9/2}$  levels of  $\text{Er}^{3+}$  before and after mPEG-COOH-5 modification.

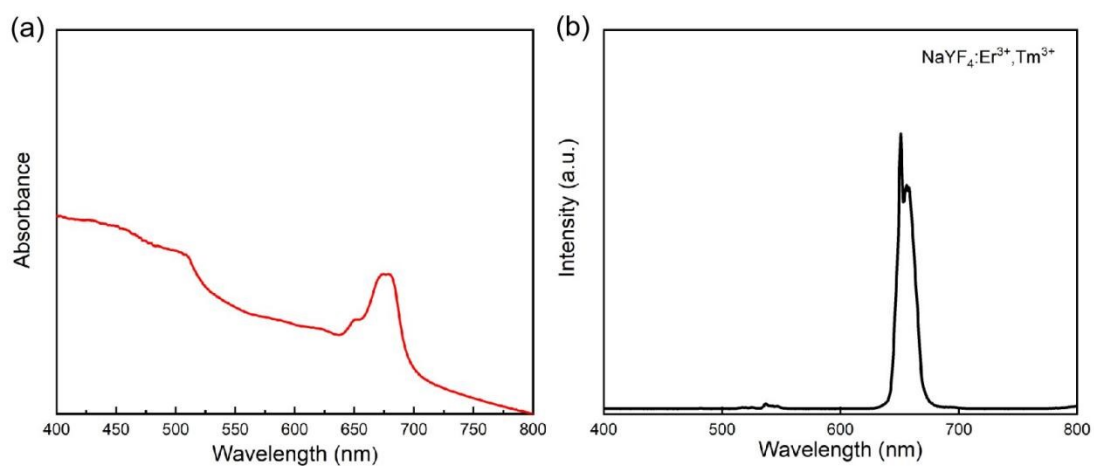

**Figure S2.** (a) Absorption spectrum of microalgae solution and (b) UCL spectra of  $\text{NaYF}_4:\text{Er}^{3+},\text{Tm}^{3+}$  nanoparticles.

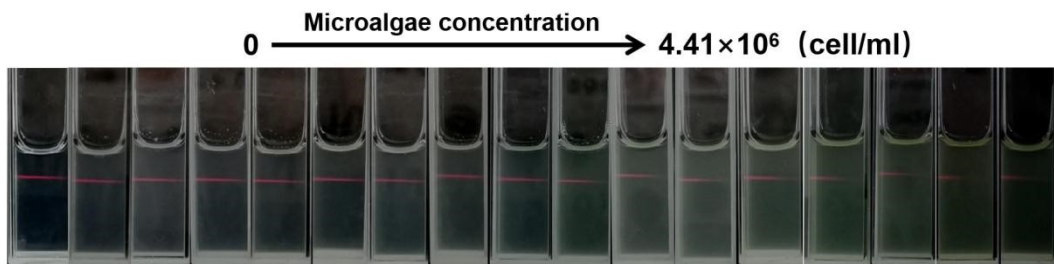

**Figure S3.** The digital photographs UCNPs solution mixed with different concentration of microalgae from 0 to  $4.41 \times 10^6$  (cell/ml) (left to right) under 980 nm excitation.
